# Supplementary material for: Robust physiologically based pharmacokinetic model of rifampicin for predicting drug–drug interactions via P‐glycoprotein induction and inhibition in the intestine, liver, and kidney
Source: PubMed Central journal article supplement — CPT Pharmacometrics Syst Pharmacol. 2022 Jun 6;11(7):919–33. doi: 10.1002/psp4.12807 (PMC9286720; doi:10.1002/psp4.12807), 2022-06-06
Supplement: PSP4-11-919-s007.pdf [file PSP4-11-919-s007.pdf]

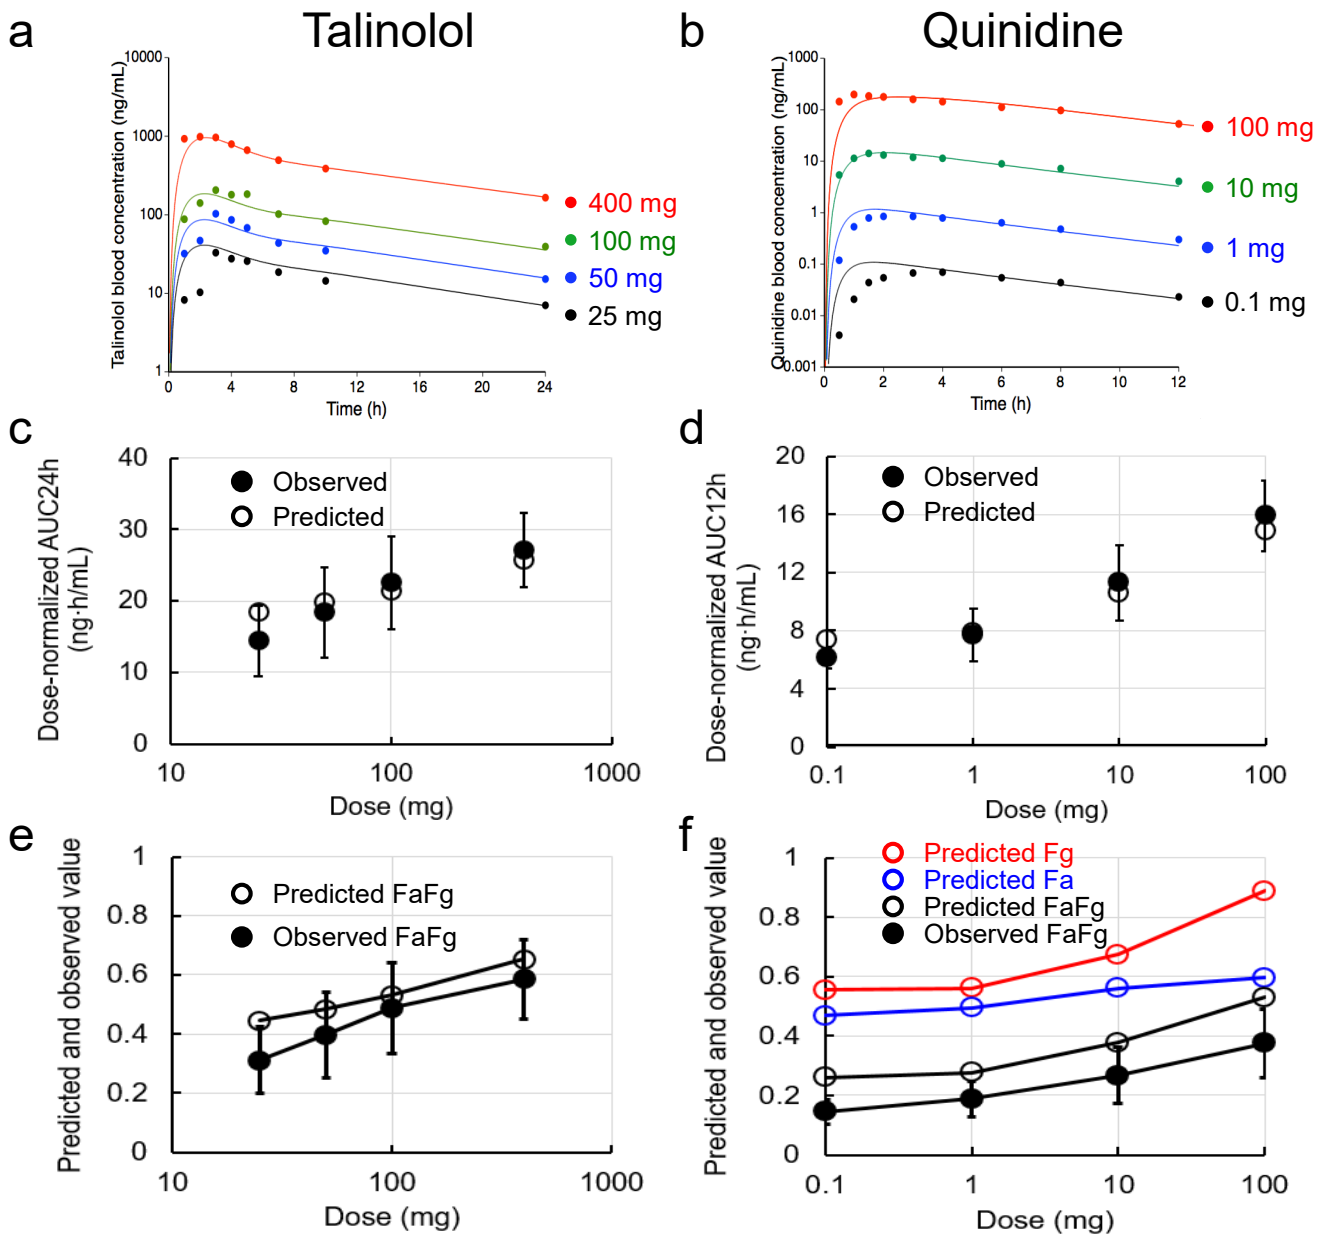

**Figure S1 Predicted and observed non-linear pharmacokinetics of talinolol and quinidine.**

(a) Closed circles and solid lines represent observed and predicted non-linear blood profiles of talinolol after single oral doses of 25 mg (black), 50 mg (blue), 100 mg (green), and 400 mg (red) talinolol. To describe the non-linearity, saturable P-gp efflux in the intestine, liver, and kidney was incorporated. The predicted talinolol profiles were shown with the hepatic  $\beta$  value of 0.5 because no major differences was observed with three  $\beta$  values of 0.2, 0.5, and 0.8. (b) Closed circles and solid lines represent observed and predicted non-linear blood profiles of quinidine after single oral doses of 0.1 mg (black), 1 mg (blue), 10 mg (green), and 100 mg (red) quinidine. To describe the non-linearity, saturable P-gp efflux in the intestine and kidney and saturable CYP3A metabolism in the intestine and liver were incorporated. (c-f) Closed and open circles represent observed and predicted dose-normalized AUC (c-d) and  $F_a F_g$  (e-f) of talinolol (c and e) and quinidine (d and f). The observed values are shown as mean  $\pm$  SD. The predicted values of talinolol and quinidine were calculated from Figures S1a and S1b, respectively. (e) Since the intestinal metabolism of talinolol is negligible ( $F_g = 1$ ),<sup>6</sup> only  $F_a F_g$  ( $= F_a$ ) is shown. AUC, area under the plasma/blood concentration-time curve; CYP, cytochrome P450;  $F_a$ , fraction of dose absorbed from gut lumen;  $F_a F_g$ , intestinal availability;  $F_g$ , fraction available after intestinal metabolism.
